# Supplementary material for: A lncRNA landscape in breast cancer reveals a potential role for AC009283.1 in proliferation and apoptosis in HER2-enriched subtype
Source: PubMed Central journal article supplement (PMC7403317; doi:10.1038/s41598-020-69905-z), 2020-08-04

**A long non-coding RNA landscape in breast cancer reveals a potential role for linc-PPP1R1B in proliferation and apoptosis in HER2-enriched molecular subtype**

Cedro-Tanda Alberto<sup>1,3</sup>, Ríos Magdalena<sup>1,6</sup>, Romero-Córdoba Sandra<sup>1,5</sup>, Cisneros Villanueva Mireya<sup>1</sup>, Rebollar-Vega Rosa Gloria<sup>4</sup>, Alfaro-Ruiz Luis Alberto<sup>1</sup>, Jiménez-Morales Silvia<sup>1</sup>, Domínguez-Reyes Carlos<sup>2</sup>, Villegas-Carlos Felipe<sup>2</sup>, Tenorio-Torres Alberto<sup>2</sup>, Bautista-Piña Verónica<sup>2</sup>, Beltrán-Anaya Fredy Omar<sup>1,3</sup>, Hidalgo-Miranda Alfredo<sup>1\*</sup>

Supplementary Figure 1. Clinical outcomes across molecular subtypes in breast cancer A. Metastasis-free survival in Mexican cohort, B. Overall survival in METABRIC cohort, C. Overall survival in TCGA cohort D. Cox Proportional Hazards ratio in METABRIC and TCGA cohorts. Univariate Cox Regression was performed using Luminal A subtype as reference.

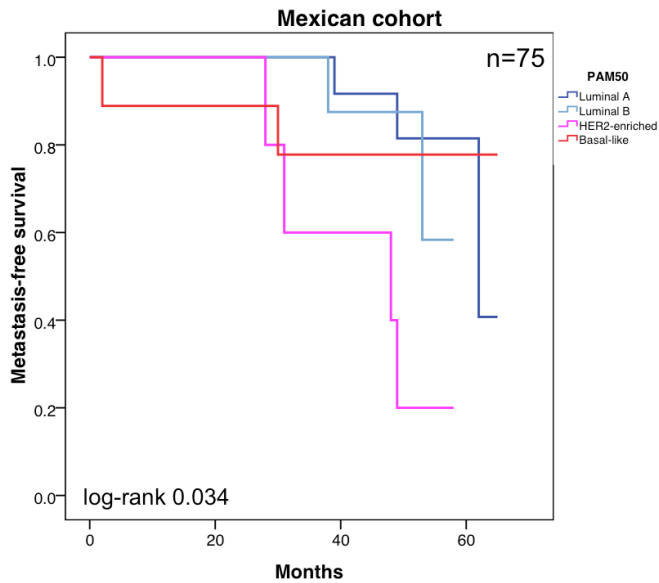

A

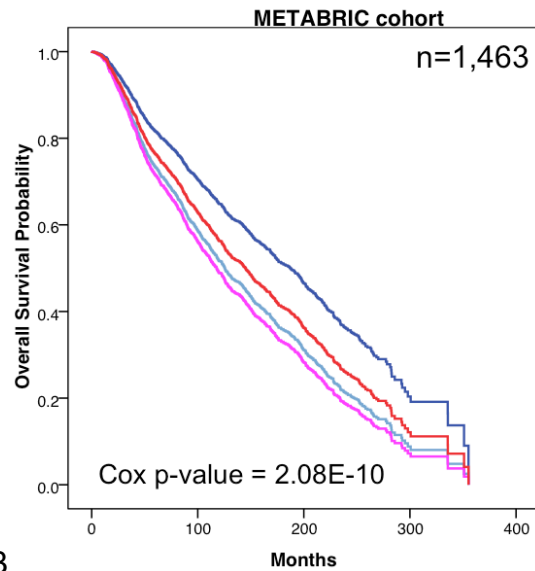

B

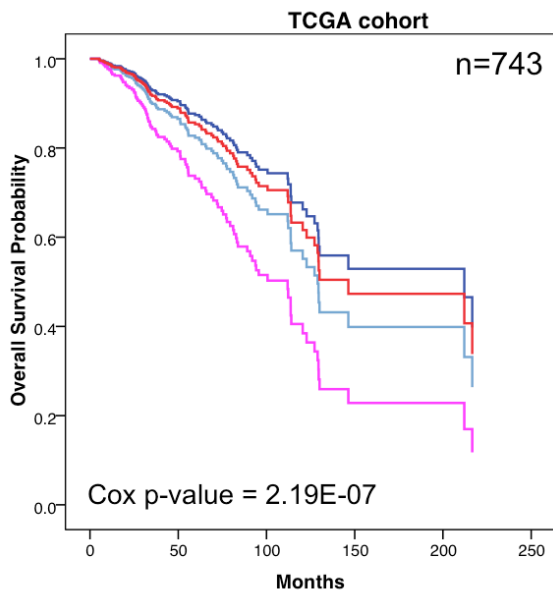

C

D

| Hazard ratio  | METABRIC | TCGA  |
|---------------|----------|-------|
| Luminal B     | 1.445    | 1.529 |
| HER2-enriched | 2.320    | 1.655 |
| Basal-like    | 1.176    | 1.329 |

Supplementary Figure 2. Overall survival for LINC01087 and RP11-379F12.4 in Luminal B tumors.

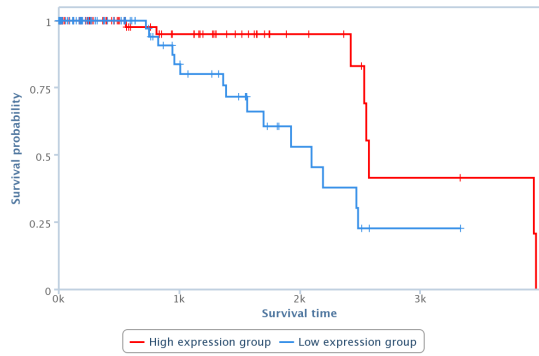

LINC01987 Cox P-value = 0.03739214

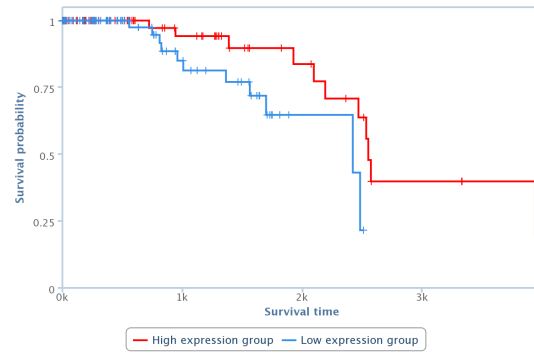

RP11-379F12.4 log-rank = 0.02798734

Supplementary Figure 3. Overall survival for U62317.2 in Basal-like tumors.

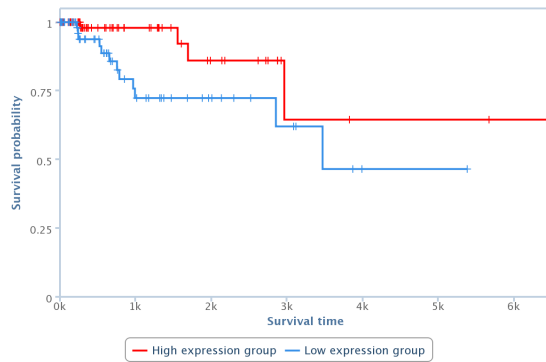

U62317.2 log-rank = 0.04378998

Supplementary Figure 4. Real time qPCR identifying SK-BR-3 cell line as a potential biological model for over-expressed AC009283.1.

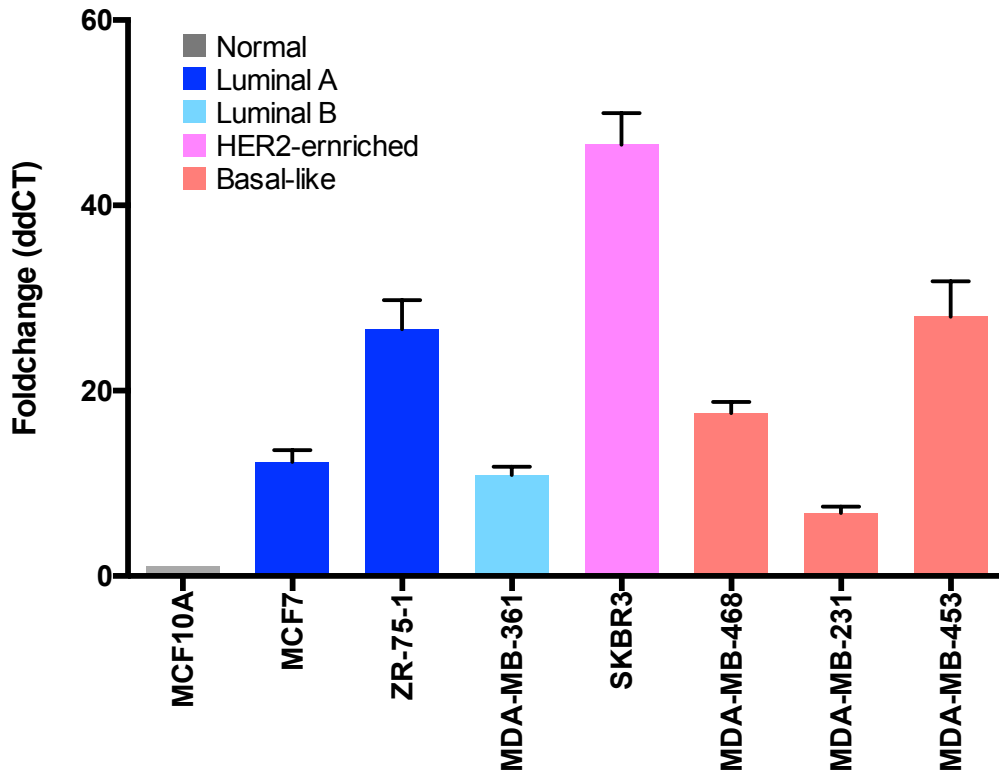

Supplementary Figure 5. Relative expression of AC009283.1 in nucleus and cytoplasm.

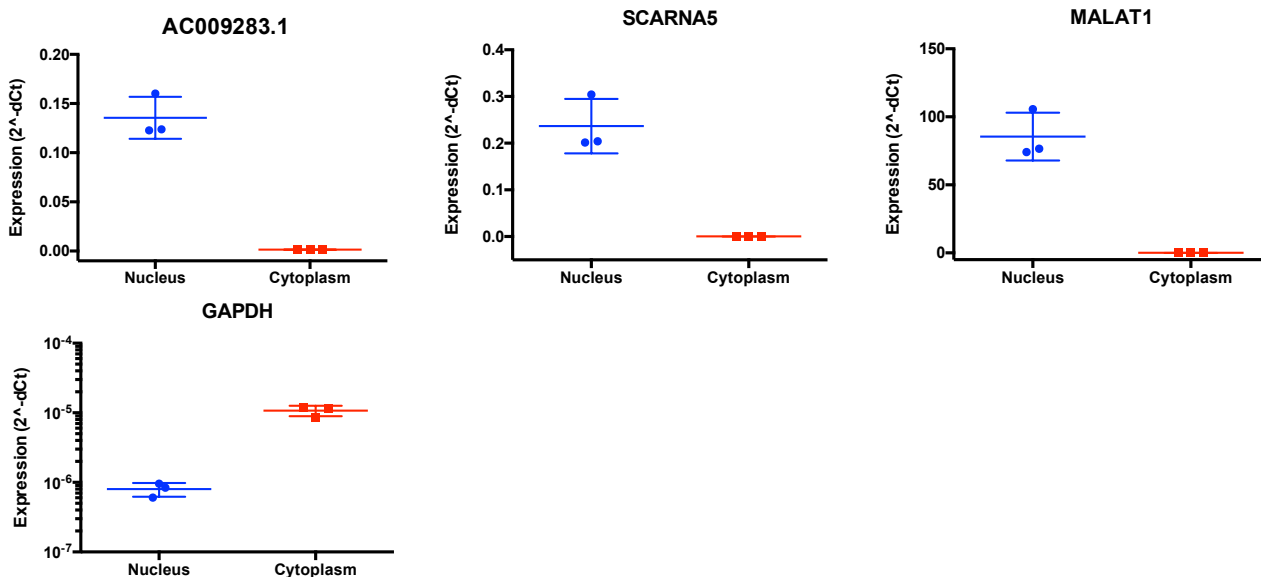

Supplementary Figure 6. Enrichment analysis of differentially expressed genes after AC009283.1 knockdown in SKBR3 cell line. Data were analyzed through the use of IPA (QIAGEN Inc., <https://www.qiagenbioinformatics.com/products/ingenuitypathway-analysis>).

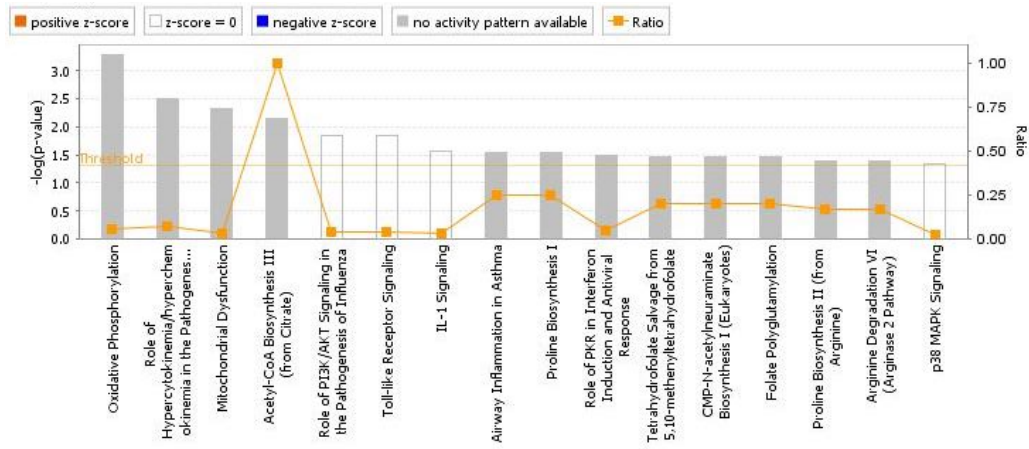

© 2000-2016 QIAGEN. All rights reserved.

Supplementary Figure 7. Correlation plots (expression vs amplification status) in top 5 up-regulated lncRNAs in the 17q12 region from HER2 tumors and its amplification status using GISTIC (loss, no change, gain and amplification).

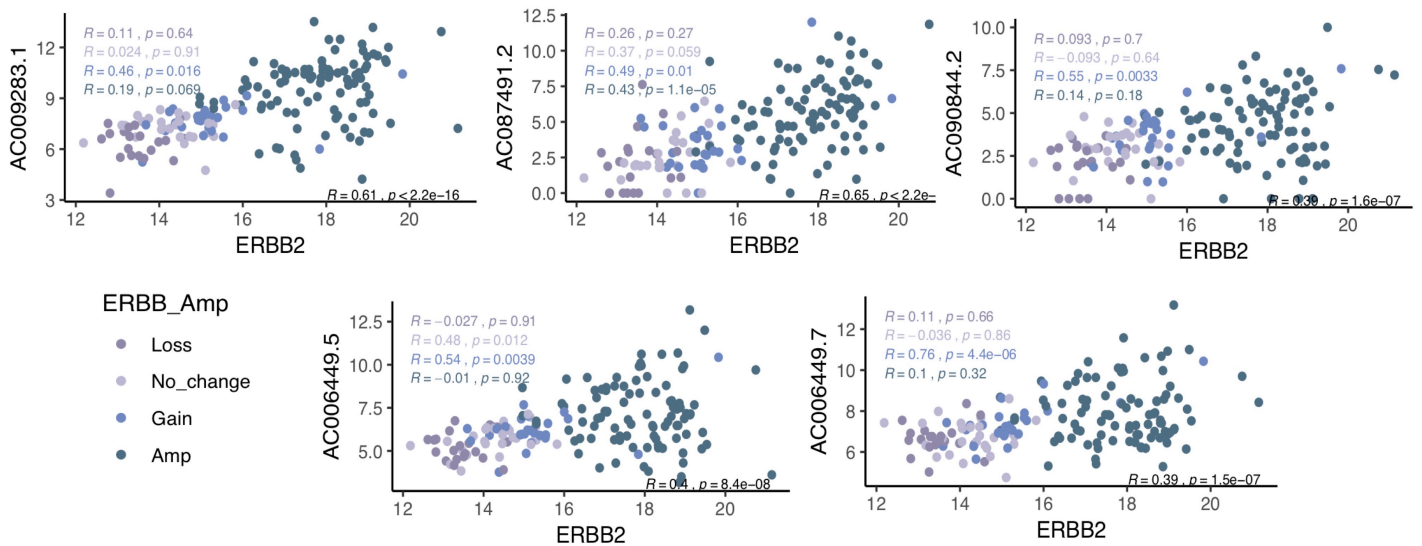

Supplement: 41598_2020_69905_MOESM1_ESM.pdf [file 41598_2020_69905_MOESM1_ESM.pdf]
